# Supplementary material
Source: ML conference proceedings conference paper supplement (https://proceedings.mlr.press/v84/cheng18b.html)
Supplement: Supplementary file [file cheng18b-supp.pdf]

## A Proofs

We now give the details for the proof of our main results, i.e., Theorems 1 and 2. Below, we outline the steps for the proof of FLAG's Theorem 1. The proof of Theorem 2 for FLARE follows the same line of reasoning. Also, we note that, in what follows, lemmas/corollaries required for the proof of Theorem 2, are given immediately after those of FLAG.

1. FLAG is essentially a combination of mirror descent and proximal gradient descent steps (Lemmas 1 and 4).
2.  $L_k$  in Algorithm 1 plays the role of an "effective gradient Lipschitz constant" in each iteration. The convergence rate of FLAG ultimately depends on  $\sum_{k=1}^T L_k = L \sum_{k=1}^T \mathbf{g}_k^T S_k^{-1} \mathbf{g}_k$ . (Lemma 8 and Corollary 3)
3. By picking  $S_k$  adaptively like in AdaGrad, we achieve a non-trivial upper bound for  $\sum_{k=1}^T L_k$ . (Lemma 5)
4. FLAG relies on picking an  $\mathbf{x}_k$  at each iteration that satisfies an inequality involving  $L_k$  (Corollary 1). However, because  $L_k$  is not known prior to picking  $\mathbf{x}_k$ , we must choose an  $\mathbf{x}_k$  to roughly satisfy the inequality for all possible values of  $L_k$ . We do this by picking  $\mathbf{x}_k$  using binary search. (Lemmas 2 and 3 and Corollary 1)
5. Finally, we need to pick the right stepsize for each iteration. Our scheme is very similar to the one used in [1], but generalized to handle a different  $L_k$  each iteration. (Lemmas 6 and 8 as well as Corollary 3).
6. Theorem 3 combines items 1, 2 and 4, above. Finally, to prove Theorem 1, we combine Theorem 3 with items 3 and 5 above.

### A.1 Proof of Theorem 1 and Theorem 2

First, we obtain the following key result (similar to [4, Lemma 2.3]) regarding the vector  $\mathbf{p} = -L(\mathbf{prox}(\mathbf{x}) - \mathbf{x})$ , as in Step 3 of FLAG, which is known as the *Gradient Mapping* of  $F$  on  $\mathcal{C}$ .

**Lemma 1 (Gradient Mapping)**

For any  $\mathbf{x}, \mathbf{y} \in \mathcal{C}$ , we have

$$F(\mathbf{prox}(\mathbf{x})) \leq F(\mathbf{y}) + \langle L(\mathbf{prox}(\mathbf{x}) - \mathbf{x}), \mathbf{y} - \mathbf{x} \rangle - \frac{L}{2} \|\mathbf{x} - \mathbf{prox}(\mathbf{x})\|_2^2,$$

where  $\mathbf{prox}(\mathbf{x})$  is defined as in (3). In particular,  $F(\mathbf{prox}(\mathbf{x})) \leq F(\mathbf{x}) - \frac{L}{2} \|\mathbf{x} - \mathbf{prox}(\mathbf{x})\|_2^2$ .

**Proof of Lemma 1** This result is the same as Lemma 2.3 in [4]. We bring its proof here for completeness.

For any  $\mathbf{y} \in \mathcal{C}$ , any sub-gradient,  $\mathbf{v}$ , of  $h$  at  $\mathbf{prox}(\mathbf{x})$ , i.e.,  $\mathbf{v} \in \partial h(\mathbf{prox}(\mathbf{x}))$ , and by optimality of  $\mathbf{prox}(\mathbf{x})$  in (3), we have

$$\begin{aligned} 0 &\leq \langle \nabla f(\mathbf{x}) + \mathbf{v} + L(\mathbf{prox}(\mathbf{x}) - \mathbf{x}), \mathbf{y} - \mathbf{prox}(\mathbf{x}) \rangle \\ &= \langle \nabla f(\mathbf{x}) + \mathbf{v} + L(\mathbf{prox}(\mathbf{x}) - \mathbf{x}), \mathbf{y} - \mathbf{x} \rangle + \langle \nabla f(\mathbf{x}) + \mathbf{v} + L(\mathbf{prox}(\mathbf{x}) - \mathbf{x}), \mathbf{x} - \mathbf{prox}(\mathbf{x}) \rangle, \end{aligned}$$

and so

$$\begin{aligned} &\langle \nabla f(\mathbf{x}), \mathbf{prox}(\mathbf{x}) - \mathbf{x} \rangle \\ &\leq \langle \nabla f(\mathbf{x}) + \mathbf{v} + L(\mathbf{prox}(\mathbf{x}) - \mathbf{x}), \mathbf{y} - \mathbf{x} \rangle \\ &\quad + \langle \mathbf{v}, \mathbf{x} - \mathbf{prox}(\mathbf{x}) \rangle - L \|\mathbf{x} - \mathbf{prox}(\mathbf{x})\|_2^2, \end{aligned}$$

Now from  $L$ -Lipschitz continuity of  $\nabla f$  as well as convexity of  $f$  and  $h$ , we get

$$\begin{aligned} &F(\mathbf{prox}(\mathbf{x})) \\ &= f(\mathbf{prox}(\mathbf{x})) + h(\mathbf{prox}(\mathbf{x})) \\ &\leq f(\mathbf{x}) + \langle \nabla f(\mathbf{x}), \mathbf{prox}(\mathbf{x}) - \mathbf{x} \rangle \\ &\quad + \frac{L}{2} \|\mathbf{prox}(\mathbf{x}) - \mathbf{x}\|_2^2 + h(\mathbf{prox}(\mathbf{x})) \\ &\leq f(\mathbf{x}) + \langle \nabla f(\mathbf{x}) + \mathbf{v} + L(\mathbf{prox}(\mathbf{x}) - \mathbf{x}), \mathbf{y} - \mathbf{x} \rangle \\ &\quad + \langle \mathbf{v}, \mathbf{x} - \mathbf{prox}(\mathbf{x}) \rangle - \frac{L}{2} \|\mathbf{x} - \mathbf{prox}(\mathbf{x})\|_2^2 \\ &\quad + h(\mathbf{prox}(\mathbf{x})) \\ &\leq f(\mathbf{y}) + \langle \mathbf{v} + L(\mathbf{prox}(\mathbf{x}) - \mathbf{x}), \mathbf{y} - \mathbf{x} \rangle \\ &\quad + \langle \mathbf{v}, \mathbf{x} - \mathbf{prox}(\mathbf{x}) \rangle - \frac{L}{2} \|\mathbf{x} - \mathbf{prox}(\mathbf{x})\|_2^2 \\ &\quad + h(\mathbf{prox}(\mathbf{x})) \\ &= f(\mathbf{y}) + \langle L(\mathbf{prox}(\mathbf{x}) - \mathbf{x}), \mathbf{y} - \mathbf{x} \rangle \\ &\quad + \langle \mathbf{v}, \mathbf{y} - \mathbf{prox}(\mathbf{x}) \rangle - \frac{L}{2} \|\mathbf{x} - \mathbf{prox}(\mathbf{x})\|_2^2 \\ &\quad + h(\mathbf{prox}(\mathbf{x})) \\ &\leq F(\mathbf{y}) + \langle L(\mathbf{prox}(\mathbf{x}) - \mathbf{x}), \mathbf{y} - \mathbf{x} \rangle \\ &\quad - \frac{L}{2} \|\mathbf{x} - \mathbf{prox}(\mathbf{x})\|_2^2. \end{aligned}$$

■

The following lemma establishes the Lipschitz continuity of the  $\mathbf{prox}$  operator.

**Lemma 2 (Prox Operator Continuity)**

$\mathbf{prox} : \mathbb{R}^d \rightarrow \mathbb{R}^d$  is a 2-Lipschitz continuous, that is, for any  $\mathbf{x}, \mathbf{y} \in \mathcal{C}$ , we have

$$\|\mathbf{prox}(\mathbf{x}) - \mathbf{prox}(\mathbf{y})\|_2 \leq 2\|\mathbf{x} - \mathbf{y}\|_2.$$

**Proof of Lemma 2** By Definition (3), for any  $\mathbf{x}, \mathbf{y}, \mathbf{z}, \mathbf{z}' \in \mathcal{C}$ ,  $\mathbf{v} \in \partial h(\mathbf{prox}(\mathbf{x}))$ , and  $\mathbf{w} \in \partial h(\mathbf{prox}(\mathbf{y}))$ , we have

$$\begin{aligned} & \langle \mathbf{v}, \mathbf{z} - \mathbf{prox}(\mathbf{x}) \rangle \\ & \geq -\langle \nabla f(\mathbf{x}) + L(\mathbf{prox}(\mathbf{x}) - \mathbf{x}), \mathbf{z} - \mathbf{prox}(\mathbf{x}) \rangle, \\ & \langle \mathbf{w}, \mathbf{z}' - \mathbf{prox}(\mathbf{y}) \rangle \\ & \geq -\langle \nabla f(\mathbf{y}) + L(\mathbf{prox}(\mathbf{y}) - \mathbf{y}), \mathbf{z}' - \mathbf{prox}(\mathbf{y}) \rangle. \end{aligned}$$

In particular, for  $\mathbf{z} = \mathbf{prox}(\mathbf{y})$  and  $\mathbf{z}' = \mathbf{prox}(\mathbf{z})$ , we get

$$\begin{aligned} & \langle \mathbf{v}, \mathbf{prox}(\mathbf{y}) - \mathbf{prox}(\mathbf{x}) \rangle \\ & \geq -\langle \nabla f(\mathbf{x}) + L(\mathbf{prox}(\mathbf{x}) - \mathbf{x}), \mathbf{prox}(\mathbf{y}) - \mathbf{prox}(\mathbf{x}) \rangle, \\ & \langle \mathbf{w}, \mathbf{prox}(\mathbf{y}) - \mathbf{prox}(\mathbf{x}) \rangle \\ & \leq \langle \nabla f(\mathbf{y}) + L(\mathbf{prox}(\mathbf{y}) - \mathbf{y}), \mathbf{prox}(\mathbf{x}) - \mathbf{prox}(\mathbf{y}) \rangle. \end{aligned}$$

By monotonicity of sub-gradient, we get

$$\langle \mathbf{v}, \mathbf{prox}(\mathbf{y}) - \mathbf{prox}(\mathbf{x}) \rangle \leq \langle \mathbf{w}, \mathbf{prox}(\mathbf{y}) - \mathbf{prox}(\mathbf{x}) \rangle.$$

So

$$\begin{aligned} & \langle \nabla f(\mathbf{x}) + L(\mathbf{prox}(\mathbf{x}) - \mathbf{x}), \mathbf{prox}(\mathbf{x}) - \mathbf{prox}(\mathbf{y}) \rangle \\ & \leq \langle \nabla f(\mathbf{y}) + L(\mathbf{prox}(\mathbf{y}) - \mathbf{y}), \mathbf{prox}(\mathbf{x}) - \mathbf{prox}(\mathbf{y}) \rangle, \end{aligned}$$

and as a result

$$\begin{aligned} & \langle \nabla f(\mathbf{x}) + L(\mathbf{prox}(\mathbf{x}) - \mathbf{x}), \mathbf{prox}(\mathbf{x}) - \mathbf{prox}(\mathbf{y}) \rangle \\ & = \langle \nabla f(\mathbf{x}) + L(\mathbf{prox}(\mathbf{x}) - \mathbf{prox}(\mathbf{y}) + \mathbf{prox}(\mathbf{y}) - \mathbf{x}), \\ & \quad \mathbf{prox}(\mathbf{x}) - \mathbf{prox}(\mathbf{y}) \rangle \\ & = L\|\mathbf{prox}(\mathbf{x}) - \mathbf{prox}(\mathbf{y})\|_2^2 \\ & \quad + \langle \nabla f(\mathbf{x}) + L(\mathbf{prox}(\mathbf{y}) - \mathbf{x}), \mathbf{prox}(\mathbf{x}) - \mathbf{prox}(\mathbf{y}) \rangle \\ & \leq \langle \nabla f(\mathbf{y}) + L(\mathbf{prox}(\mathbf{y}) - \mathbf{y}), \mathbf{prox}(\mathbf{x}) - \mathbf{prox}(\mathbf{y}) \rangle, \end{aligned}$$

which gives

$$\begin{aligned} & L\|\mathbf{prox}(\mathbf{x}) - \mathbf{prox}(\mathbf{y})\|_2^2 \\ & \leq \langle \nabla f(\mathbf{y}) - \nabla f(\mathbf{x}) + L(\mathbf{x} - \mathbf{y}), \mathbf{prox}(\mathbf{x}) - \mathbf{prox}(\mathbf{y}) \rangle \\ & \leq (\|\nabla f(\mathbf{y}) - \nabla f(\mathbf{x})\|_2 \\ & \quad + L\|\mathbf{x} - \mathbf{y}\|_2) \|\mathbf{prox}(\mathbf{x}) - \mathbf{prox}(\mathbf{y})\|_2 \\ & \leq 2L\|\mathbf{x} - \mathbf{y}\|_2 \|\mathbf{prox}(\mathbf{x}) - \mathbf{prox}(\mathbf{y})\|_2, \end{aligned}$$

and the result follows.  $\blacksquare$

Using  $\mathbf{prox}$  operator continuity Lemma 2, we can conclude that given any  $\mathbf{y}, \mathbf{z} \in \mathcal{C}$ , if  $\langle \mathbf{prox}(\mathbf{y}) - \mathbf{y}, \mathbf{y} - \mathbf{z} \rangle < 0$  and  $\langle \mathbf{prox}(\mathbf{z}) - \mathbf{z}, \mathbf{y} - \mathbf{z} \rangle > 0$ , then there must be a  $t^* \in (0, 1)$  for which  $\mathbf{w} = t^*\mathbf{y} + (1 - t^*)\mathbf{z}$  gives  $\langle \mathbf{prox}(\mathbf{w}) - \mathbf{w}, \mathbf{y} - \mathbf{z} \rangle = 0$ . Algorithm 2 finds an approximation to  $\mathbf{w}$  in  $\mathcal{O}(\log L/\epsilon)$  iterations.

### Lemma 3 (Binary Search Lemma)

Let  $\mathbf{x} = \text{BinarySearch}(\mathbf{z}, \mathbf{y}, \epsilon)$  defined as in Algorithm 2. Then one of 3 cases happen:

- (i)  $\mathbf{x} = \mathbf{y}$  and  $\langle \mathbf{prox}(\mathbf{x}) - \mathbf{x}, \mathbf{x} - \mathbf{z} \rangle \geq 0$ ,
- (ii)  $\mathbf{x} = \mathbf{z}$  and  $\langle \mathbf{prox}(\mathbf{x}) - \mathbf{x}, \mathbf{y} - \mathbf{x} \rangle \leq 0$ , or
- (iii)  $\mathbf{x} = t\mathbf{y} + (1 - t)\mathbf{z}$  for some  $t \in (0, 1)$  and  $|\langle \mathbf{prox}(\mathbf{x}) - \mathbf{x}, \mathbf{y} - \mathbf{z} \rangle| \leq 3\|\mathbf{y} - \mathbf{z}\|_2^2 \epsilon$ .

**Proof of Lemma 3** Items (i) and (ii), are simply Steps 2 and 5, respectively. For item (iii), we have

$$\begin{aligned} & \|\mathbf{x} - \mathbf{w}\|_2 \\ & = \|t\mathbf{y} + (1 - t)\mathbf{z} - t^*\mathbf{y} - (1 - t^*)\mathbf{z}\|_2 \\ & = \|(t - t^*)\mathbf{y} - (t - t^*)\mathbf{z}\|_2 \\ & \leq \epsilon\|\mathbf{y} - \mathbf{z}\|_2. \end{aligned}$$

Now it follows that

$$\begin{aligned} & |\langle \mathbf{prox}(\mathbf{x}) - \mathbf{x}, \mathbf{y} - \mathbf{z} \rangle| \\ & = |\langle \mathbf{prox}(\mathbf{x}) - \mathbf{x}, \mathbf{y} - \mathbf{z} \rangle - \langle \mathbf{prox}(\mathbf{w}) - \mathbf{w}, \mathbf{y} - \mathbf{z} \rangle| \\ & \leq \|\langle \mathbf{prox}(\mathbf{x}) - \mathbf{prox}(\mathbf{w}), \mathbf{y} - \mathbf{z} \rangle\|_2 + \|\langle \mathbf{x} - \mathbf{w}, \mathbf{y} - \mathbf{z} \rangle\|_2 \\ & \leq \|\mathbf{prox}(\mathbf{x}) - \mathbf{prox}(\mathbf{w})\|_2 \|\mathbf{y} - \mathbf{z}\|_2 \\ & \quad + \|\mathbf{x} - \mathbf{w}\|_2 \|\mathbf{y} - \mathbf{z}\|_2 \\ & \leq 2\|\mathbf{x} - \mathbf{w}\|_2 \|\mathbf{y} - \mathbf{z}\|_2 \\ & \quad + \|\mathbf{x} - \mathbf{w}\|_2 \|\mathbf{y} - \mathbf{z}\|_2 \\ & = 3\|\mathbf{x} - \mathbf{w}\|_2 \|\mathbf{y} - \mathbf{z}\|_2 \\ & \leq 3\epsilon\|\mathbf{y} - \mathbf{z}\|_2^2. \end{aligned}$$

Where the third inequality follows by Lemma 2  $\blacksquare$

Using the above result, we can prove the following:

### Corollary 1

Let  $\mathbf{x}_k, \mathbf{y}_k, \mathbf{z}_k$  and  $\epsilon_k$  be defined as in Algorithm 1 and  $\eta_k L_k \geq 1$ . Then for all  $k \geq 1$ ,

$$\langle \mathbf{p}_k, \mathbf{x}_k - \mathbf{z}_k \rangle \leq (\eta_k L_k - 1) \langle \mathbf{p}_k, \mathbf{y}_k - \mathbf{x}_k \rangle + \frac{DL\eta_k L_k}{T^3}.$$

**Proof of Corollary 1** Note that by Step 3 of Algorithm 1,  $\mathbf{p}_k = -L(\mathbf{prox}(\mathbf{x}_k) - \mathbf{x}_k)$ . For  $k = 1$ , since  $\mathbf{x}_1 = \mathbf{y}_1 = \mathbf{z}_1$ , the inequality is trivially true. For  $k \geq 2$ , we consider the three cases of Lemma 3: (i) if  $\mathbf{x}_k = \mathbf{y}_k$ , the right hand side is  $1/T \geq 0$  and the left hand side is  $\langle \mathbf{p}_k, \mathbf{x}_k - \mathbf{z}_k \rangle = \langle -L(\mathbf{prox}(\mathbf{x}_k) - \mathbf{x}_k), \mathbf{x}_k - \mathbf{z}_k \rangle \leq 0$ , (ii) if  $\mathbf{x}_k = \mathbf{z}_k$ , the left hand side

is 0 and  $\langle \mathbf{p}_k, \mathbf{y}_k - \mathbf{x}_k \rangle = \langle -L(\mathbf{prox}(\mathbf{x}_k) - \mathbf{x}_k), \mathbf{y}_k - \mathbf{x}_k \rangle \geq 0$ , so the inequality holds trivially, and (iii) in this last case, for some  $t \in (0, 1)$ , we have

$$\begin{aligned} & \langle \mathbf{p}_k, \mathbf{x}_k - \mathbf{z}_k \rangle \\ &= \langle -L(\mathbf{prox}(\mathbf{x}_k) - \mathbf{x}_k), t\mathbf{y}_k + (1-t)\mathbf{z}_k - \mathbf{z}_k \rangle \\ &= -Lt \langle (\mathbf{prox}(\mathbf{x}_k) - \mathbf{x}_k), \mathbf{y}_k - \mathbf{z}_k \rangle, \end{aligned}$$

and

$$\begin{aligned} & \langle \mathbf{p}_k, \mathbf{y}_k - \mathbf{x}_k \rangle \\ &= \langle -L(\mathbf{prox}(\mathbf{x}_k) - \mathbf{x}_k), \mathbf{y}_k - t\mathbf{y}_k - (1-t)\mathbf{z}_k \rangle \\ &= -L(1-t) \langle (\mathbf{prox}(\mathbf{x}_k) - \mathbf{x}_k), (\mathbf{y}_k - \mathbf{z}_k) \rangle. \end{aligned}$$

Hence

$$\begin{aligned} & \langle \mathbf{p}_k, \mathbf{x}_k - \mathbf{z}_k \rangle - (\eta_k L_k - 1) \langle \mathbf{p}_k, \mathbf{y}_k - \mathbf{x}_k \rangle \\ & \leq | \langle \mathbf{p}_k, \mathbf{x}_k - \mathbf{z}_k \rangle - (\eta_k L_k - 1) \langle \mathbf{p}_k, \mathbf{y}_k - \mathbf{x}_k \rangle | \\ & = | (-Lt + (\eta_k L_k - 1)L(1-t)) \\ & \quad \langle (\mathbf{prox}(\mathbf{x}_k) - \mathbf{x}_k), (\mathbf{y}_k - \mathbf{z}_k) \rangle | \\ & \leq 3 | (-Lt + (\eta_k L_k - 1)L(1-t)) | \| \mathbf{y}_k - \mathbf{z}_k \|_2^2 \epsilon_k \\ & = 3 | \eta_k L_k (1-t) + 1 | L \| \mathbf{y}_k - \mathbf{z}_k \|_2^2 \epsilon_k \\ & = 3(\eta_k L_k + 1)L \| \mathbf{y}_k - \mathbf{z}_k \|_2^2 \epsilon_k \\ & = 6\eta_k L_k L \| \mathbf{y}_k - \mathbf{z}_k \|_2^2 \epsilon_k \\ & = \frac{6D\eta_k L_k L \| \mathbf{y}_k - \mathbf{z}_k \|_2^2}{D} \frac{1}{6dT^3} \\ & \leq \frac{DL\eta_k L_k}{T^3}, \end{aligned}$$

where in the last line we used the fact that  $\| \mathbf{y}_k - \mathbf{z}_k \|_2^2 \leq Dd$  ■

Similar to 1 for Algorithm 1, the following Lemma proves an analogous result for Algorithm 3.

### Corollary 2

Let  $\mathbf{x}_k, \mathbf{y}_k, \mathbf{z}_k$  and  $\epsilon_k$  be defined as in Algorithm 3 and  $\eta_k \tilde{L}_k \geq 1$ . Then for all  $k \geq 1$ ,

$$\langle \mathbf{p}_k, \mathbf{x}_k - \mathbf{z}_k \rangle \leq (\eta_k \tilde{L}_k - 1) \langle \mathbf{p}_k, \mathbf{y}_k - \mathbf{x}_k \rangle + \frac{DL\eta_k \tilde{L}_k}{T^3}.$$

**Proof of Corollary 2** We consider two cases:

1. If  $\mathbf{x}_k$  is generated through Algorithm 5, then  $\mathbf{x}_k = \text{BinarySearch}(\mathbf{y}_k, \mathbf{z}_k, \epsilon)$  and  $L_k = L_k$ , so the statement follows from Corollary 1.

2. If  $\mathbf{x}_k$  is generated through Algorithm 4, then  $\mathbf{x}_k = \left(1 - \frac{1}{\eta_k L_k}\right) \mathbf{y}_k + \frac{1}{\eta_k L_k} \mathbf{z}_k$ , and so satisfies

$$\langle \mathbf{p}_k, \mathbf{x}_k - \mathbf{z}_k \rangle = (\eta_k \tilde{L}_k - 1) \langle \mathbf{p}_k, \mathbf{y}_k - \mathbf{x}_k \rangle$$

Next, we state a result regarding the mirror descent step. Similar results can be found in most texts on online optimization, e.g. [1].

### Lemma 4 (Mirror Descent Inequality)

Let  $\mathbf{z}_{k+1} = \arg \min_{\mathbf{z} \in \mathcal{C}} \langle \eta_k \mathbf{p}_k, \mathbf{z} - \mathbf{z}_k \rangle + \frac{1}{2} \| \mathbf{z} - \mathbf{z}_k \|_{S_k}^2$  and  $D := \sup_{\mathbf{x}, \mathbf{y} \in \mathcal{C}} \| \mathbf{x} - \mathbf{y} \|_\infty^2$  be the diameter of  $\mathcal{C}$  measured by infinity norm. Then for any  $\mathbf{u} \in \mathcal{C}$ , we have

$$\sum_{k=1}^T \langle \eta_k \mathbf{p}_k, \mathbf{z}_k - \mathbf{u} \rangle \leq \sum_{k=1}^T \frac{\eta_k^2}{2} \| \mathbf{p}_k \|_{S_k^*}^2 + \frac{D}{2} \| \mathbf{s}_T \|_1$$

**Proof of Lemma 4** For any  $\mathbf{u} \in \mathcal{C}$  and by optimality of  $\mathbf{z}_{k+1}$ , we have  $\langle \eta_k \mathbf{p}_k, \mathbf{z}_{k+1} - \mathbf{u} \rangle \leq \langle S_k(\mathbf{z}_{k+1} - \mathbf{z}_k), \mathbf{u} - \mathbf{z}_{k+1} \rangle$ . Hence, using (5) and (4), it follows that

$$\begin{aligned} & \langle \eta_k \mathbf{p}_k, \mathbf{z}_k - \mathbf{u} \rangle \\ &= \langle \eta_k \mathbf{p}_k, \mathbf{z}_k - \mathbf{z}_{k+1} \rangle + \langle \eta_k \mathbf{p}_k, \mathbf{z}_{k+1} - \mathbf{u} \rangle \\ & \leq \langle \eta_k \mathbf{p}_k, \mathbf{z}_k - \mathbf{z}_{k+1} \rangle - \langle S_k(\mathbf{z}_{k+1} - \mathbf{z}_k), \mathbf{z}_{k+1} - \mathbf{u} \rangle \\ &= \langle \eta_k \mathbf{p}_k, \mathbf{z}_k - \mathbf{z}_{k+1} \rangle - \frac{1}{2} \| \mathbf{z}_{k+1} - \mathbf{z}_k \|_{S_k}^2 \\ & \quad - \frac{1}{2} \| \mathbf{z}_{k+1} - \mathbf{u} \|_{S_k}^2 + \frac{1}{2} \| \mathbf{u} - \mathbf{z}_k \|_{S_k}^2 \\ & \leq \sup_{\mathbf{z} \in \mathbb{R}^d} \left\{ \langle \eta_k \mathbf{p}_k, \mathbf{z} \rangle - \frac{1}{2} \| \mathbf{z} \|_{S_k}^2 \right\} \\ & \quad - \frac{1}{2} \| \mathbf{z}_{k+1} - \mathbf{u} \|_{S_k}^2 + \frac{1}{2} \| \mathbf{u} - \mathbf{z}_k \|_{S_k}^2 \\ &= \frac{\eta_k^2}{2} \| \mathbf{p}_k \|_{S_k^*}^2 - \frac{1}{2} \| \mathbf{u} - \mathbf{z}_{k+1} \|_{S_k}^2 + \frac{1}{2} \| \mathbf{u} - \mathbf{z}_k \|_{S_k}^2. \end{aligned}$$

Now recalling from Steps 5- 7 of Algorithm 1 that  $S_k = \text{diag}(\mathbf{s}_k) + \delta \mathbb{I}$  and  $\mathbf{s}_k \geq \mathbf{s}_{k-1}$ , we sum over  $k$  to

get

$$\begin{aligned}
& \sum_{k=1}^T \langle \eta_k \mathbf{p}_k, \mathbf{z}_k - \mathbf{u} \rangle \\
& \leq \sum_{k=1}^T \frac{\eta_k^2}{2} \|\mathbf{p}_k\|_{S_k^*}^2 + \frac{1}{2} \|\mathbf{u} - \mathbf{z}_1\|_{S_1}^2 \\
& \quad + \sum_{k=2}^T \frac{1}{2} \|\mathbf{u} - \mathbf{z}_k\|_{S_k}^2 - \frac{1}{2} \|\mathbf{u} - \mathbf{z}_k\|_{S_{k-1}}^2 \\
& = \sum_{k=1}^T \frac{\eta_k^2}{2} \|\mathbf{p}_k\|_{S_k^*}^2 + \frac{1}{2} \|\mathbf{u} - \mathbf{z}_1\|_{S_1}^2 \\
& \quad + \frac{1}{2} \sum_{k=2}^T \langle (S_k - S_{k-1})(\mathbf{u} - \mathbf{z}_k), \mathbf{u} - \mathbf{z}_k \rangle \\
& \leq \sum_{k=1}^T \frac{\eta_k^2}{2} \|\mathbf{p}_k\|_{S_k^*}^2 + \frac{1}{2} \|\mathbf{u} - \mathbf{z}_1\|_{\infty}^2 \langle \mathbf{s}_1, \mathbf{1} \rangle \\
& \quad + \frac{1}{2} \sum_{k=2}^T \|\mathbf{u} - \mathbf{z}_k\|_{\infty}^2 \langle \mathbf{s}_k - \mathbf{s}_{k-1}, \mathbf{1} \rangle \\
& \leq \sum_{k=1}^T \frac{\eta_k^2}{2} \|\mathbf{p}_k\|_{S_k^*}^2 + \frac{D}{2} \langle \mathbf{s}_1, \mathbf{1} \rangle + \frac{D}{2} \sum_{k=2}^T \langle \mathbf{s}_k - \mathbf{s}_{k-1}, \mathbf{1} \rangle \\
& = \sum_{k=1}^T \frac{\eta_k^2}{2} \|\mathbf{p}_k\|_{S_k^*}^2 + \frac{D}{2} \|\mathbf{s}_T\|_1
\end{aligned}$$

■

Finally, we state a similar result to that of [17] that captures the benefits of using  $S_k$  in FLAG.

**Lemma 5 (AdaGrad Inequalities)**

Define  $q_T := \sum_{i=1}^d \|G_T(i, \cdot)\|_2$ , where  $G_k$  is as in Step 5 of Algorithm 1. We have

- (i)  $\sum_{k=1}^T \mathbf{g}_k^T S_k^{-1} \mathbf{g}_k \leq 2q_T$ ,
- (ii)  $q_T^2 = \min_{S \in \mathcal{S}} \sum_{k=1}^T \mathbf{g}_k^T S^{-1} \mathbf{g}_k$ , where  $\mathcal{S} := \{S \in \mathbb{R}^{d \times d} \mid S \text{ is diagonal, } S_{ii} > 0, \text{ trace}(S) \leq 1\}$ , and
- (iii)  $\sqrt{T} \leq q_T \leq \sqrt{dT}$ .

**Proof of Lemma 5** To prove part (i), we use the following inequality introduced in the proof of Lemma 4 in [17]: for any arbitrary real-valued sequence of  $\{a_i\}_{i=1}^T$  and its vector representation as  $a_{1:T} = [a_1, a_2, \dots, a_T]$ , we have

$$\sum_{k=1}^T \frac{a_k^2}{\|a_{1:k}\|_2} \leq 2\|a_{1:T}\|_2.$$

So it follows that

$$\begin{aligned}
& \sum_{k=1}^T \mathbf{g}_k^T S_k^{-1} \mathbf{g}_k \\
& = \sum_{k=1}^T \sum_{i=1}^d \frac{\mathbf{g}_k^2(i)}{\mathbf{s}_k^2(i)} \\
& = \sum_{i=1}^d \sum_{k=1}^T \frac{\mathbf{g}_k^2(i)}{\mathbf{s}_k(i)} \\
& = \sum_{i=1}^d \sum_{k=1}^T \frac{\mathbf{g}_k^2(i)}{\|G_k(i, \cdot)\|_2} \\
& \leq 2q_T,
\end{aligned}$$

where the last equality follows from the definition of  $\mathbf{s}_k$  in Step 6 of Algorithm 1.

For the rest of the proof, one can easily see that

$$\sum_{k=1}^T \mathbf{g}_k^T S^{-1} \mathbf{g}_k = \sum_{k=1}^T \sum_{i=1}^d \frac{\mathbf{g}_k^2(i)}{\mathbf{s}(i)} = \sum_{i=1}^d \frac{a(i)}{\mathbf{s}(i)},$$

where  $a(i) := \sum_{k=1}^T \mathbf{g}_k^2(i)$  and  $\mathbf{s} = \text{diag}(S)$ . Now the Lagrangian for  $\lambda \geq 0$  and  $\boldsymbol{\nu} \geq \mathbf{0}$ , can be written as

$$\mathcal{L}(\mathbf{s}, \lambda, \boldsymbol{\nu}) = \sum_{i=1}^d \frac{a(i)}{\mathbf{s}(i)} + \lambda \left( \sum_{i=1}^d \mathbf{s}(i) - 1 \right) + \langle \boldsymbol{\nu}, \mathbf{s} \rangle.$$

Since the strong duality holds, for any primal-dual optimal solutions,  $S^*$ ,  $\lambda^*$  and  $\boldsymbol{\nu}^*$ , it follows from complementary slackness that  $\boldsymbol{\nu}^* = \mathbf{0}$  (since  $\mathbf{s}^* > \mathbf{0}$ ). Now requiring that  $\partial \mathcal{L}(\mathbf{s}^*, \lambda^*, \boldsymbol{\nu}^*) / \partial \mathbf{s}(i) = 0$  gives  $\lambda^* \mathbf{s}^*(i) = \sqrt{a_i} > 0$ , which since  $\mathbf{s}^*(i) > 0$ , implies that  $\lambda^* > 0$ . As a result, by using complementary slackness again, we must have  $\sum_{i=1}^d \mathbf{s}^*(i) = 1$ . Now simple algebraic calculations gives  $\mathbf{s}^*(i) = \sqrt{a_i} / (\sum_{i=1}^d \sqrt{a_i})$  and part (ii) follows.

For part (iii), recall that  $\|\mathbf{g}_k\|_2 = 1$ . Now, since  $\lambda_{\min}(S^{01}) \geq 1$ , one has  $1 \leq \mathbf{g}_k^T S^{-1} \mathbf{g}_k$ , and so  $q_T \geq 1$ . On the other hand, consider the optimization problem

$$\begin{aligned}
& \max \sum_{i=1}^d \|G_T(i, \cdot)\|_2 = \sum_{i=1}^d \sqrt{\sum_{k=1}^T \mathbf{g}_i^2(k)} \\
& \text{s.t. } \|\mathbf{g}_k\|_2^2 = 1, \quad k = 1, 2, \dots, T.
\end{aligned}$$

The Lagrangian can be written as

$$\begin{aligned}
\mathcal{L}(\{\mathbf{g}_k\}_{k=1}^T, \{\lambda\}_{k=1}^T) & = \sum_{i=1}^d \sqrt{\sum_{k=1}^T \mathbf{g}_i^2(k)} \\
& \quad + \sum_{k=1}^T \lambda_k \left( 1 - \sum_{i=1}^d \mathbf{g}_i^2(k) \right).
\end{aligned}$$

By KKT necessary condition, we require that  $\partial\mathcal{L}(\{\mathbf{g}_k\}_{k=1}^T, \{\lambda\}_{k=1}^T)/\partial\mathbf{g}_i(k) = 0$ , which implies that  $\lambda_k = 1/(2\sqrt{\sum_{k=1}^T \mathbf{g}_i^2(k)})$ ,  $i = 1, 2, \dots, d$ . Hence,  $T = \sum_{i=1}^d \sum_{k=1}^T \mathbf{g}_i^2(k) = d/(4\lambda_k^2)$ , and so  $2\lambda_k = \sqrt{d/T}$ , which gives  $q_T \leq \sqrt{dT}$ .  $\blacksquare$

We can now prove the central theorems of which is used to obtain FLAG's main result.

### Theorem 3

Let  $D := \sup_{\mathbf{x}, \mathbf{y} \in \mathcal{C}} \|\mathbf{x} - \mathbf{y}\|_\infty^2$ . For any  $\mathbf{u} \in \mathcal{C}$ , after  $T$  iterations of Algorithm 1, we get

$$\begin{aligned} & \sum_{k=1}^T \left\{ (\eta_{k-1}^2 L_{k-1} - \eta_k^2 L_k + \eta_k) F(\mathbf{y}_k) - \eta_k F(\mathbf{u}) \right\} \\ & + \eta_T^2 L_T F(\mathbf{y}_{T+1}) \\ & \leq \sum_{k=1}^T \frac{DL\eta_k^2 L_k}{T^3} + \frac{D}{2} \|\mathbf{s}_T\|_1. \end{aligned}$$

**Proof of Theorem 3** Noting that  $\mathbf{p}_k = -L(\mathbf{y}_{k+1} - \mathbf{x}_k)$  is the gradient mapping of  $F$  16

on  $\mathcal{C}$ , it follows that

$$\begin{aligned} & \sum_{k=1}^T \eta_k (F(\mathbf{y}_{k+1}) - F(\mathbf{u})) \\ & = \sum_{k=1}^T \eta_k (F(\mathbf{prox}(\mathbf{x}_k)) - F(\mathbf{u})) \\ & \leq \sum_{k=1}^T \eta_k \langle \mathbf{p}_k, \mathbf{x}_k - \mathbf{u} \rangle - \frac{\eta_k}{2L} \|\mathbf{p}_k\|_2^2 \\ & = \sum_{k=1}^T \eta_k \langle \mathbf{p}_k, (\mathbf{z}_k - \mathbf{u}) \rangle + \sum_{k=1}^T \eta_k \langle \mathbf{p}_k, \mathbf{x}_k - \mathbf{z}_k \rangle - \frac{\eta_k}{2L} \|\mathbf{p}_k\|_2^2 \\ & \leq \sum_{k=1}^T \frac{\eta_k^2}{2} \|\mathbf{p}_k\|_{S_k}^2 + \frac{D}{2} \|\mathbf{s}_T\|_1 + \sum_{k=1}^T \eta_k \langle \mathbf{p}_k, \mathbf{x}_k - \mathbf{z}_k \rangle - \frac{\eta_k}{2L} \|\mathbf{p}_k\|_2^2 \\ & = \sum_{k=1}^T \frac{\eta_k (\eta_k L_k - 1)}{2L} \|\mathbf{p}_k\|_2^2 + \frac{D}{2} \|\mathbf{s}_T\|_1 + \sum_{k=1}^T \eta_k \langle \mathbf{p}_k, \mathbf{x}_k - \mathbf{z}_k \rangle \\ & \leq \sum_{k=1}^T \frac{\eta_k (\eta_k L_k - 1)}{2L} \|\mathbf{p}_k\|_2^2 + \frac{D}{2} \|\mathbf{s}_T\|_1 \\ & \quad + \sum_{k=1}^T \left( \eta_k (\eta_k L_k - 1) \langle \mathbf{p}_k, \mathbf{y}_k - \mathbf{x}_k \rangle + \frac{DL\eta_k^2 L_k}{T^3} \right) \\ & \leq \sum_{k=1}^T \frac{DL\eta_k^2 L_k}{T^3} + \frac{D}{2} \|\mathbf{s}_T\|_1 \\ & \quad + \sum_{k=1}^T \eta_k (\eta_k L_k - 1) (F(\mathbf{y}_k) - F(\mathbf{y}_{k+1})). \quad (\text{Lemma 1}) \end{aligned}$$

Where the first inequality is by Lemma 1, the second inequality is by Lemma 4, the third equality is by Step 8 of Algorithm 1, and the second last inequality is by Corollary 1. Now we have

$$\begin{aligned} & \sum_{k=1}^T \eta_k (F(\mathbf{y}_{k+1}) - F(\mathbf{u})) - \eta_k (\eta_k L_k - 1) (F(\mathbf{y}_k) - F(\mathbf{y}_{k+1})) \\ & = \sum_{k=1}^T \eta_k F(\mathbf{y}_{k+1}) - \eta_k F(\mathbf{u}) - \eta_k (\eta_k L_k - 1) F(\mathbf{y}_k) \\ & \quad + \eta_k (\eta_k L_k - 1) F(\mathbf{y}_{k+1}) \\ & = \sum_{k=1}^T \eta_k^2 L_k F(\mathbf{y}_{k+1}) - \eta_k F(\mathbf{u}) - \eta_k (\eta_k L_k - 1) F(\mathbf{y}_k) \\ & = \eta_T^2 L_T F(\mathbf{y}_{T+1}) \\ & \quad + \sum_{k=1}^T \eta_{k-1}^2 L_{k-1} F(\mathbf{y}_k) - \eta_k F(\mathbf{u}) - \eta_k (\eta_k L_k - 1) F(\mathbf{y}_k) \\ & = \eta_T^2 L_T F(\mathbf{y}_{T+1}) \\ & \quad + \sum_{k=1}^T (\eta_{k-1}^2 L_{k-1} - \eta_k^2 L_k + \eta_k) F(\mathbf{y}_k) - \eta_k F(\mathbf{u}), \end{aligned}$$

and the result follows.  $\blacksquare$

Once again, we present the analog of Theorem 3 for Algorithm 3.

**Theorem 4**

Let  $D := \sup_{\mathbf{x}, \mathbf{y} \in \mathcal{C}} \|\mathbf{x} - \mathbf{y}\|_\infty^2$ . For any  $\mathbf{u} \in \mathcal{C}$ , after  $T$  iterations of Algorithm 1, we get

$$\begin{aligned} & \sum_{k=1}^T \left\{ \left( \eta_{k-1}^2 \tilde{L}_{k-1} - \eta_k^2 \tilde{L}_k + \eta_k \right) F(\mathbf{y}_k) - \eta_k F(\mathbf{u}) \right\} \\ & + \eta_T^2 \tilde{L}_T F(\mathbf{y}_{T+1}) \\ & \leq \sum_{k=1}^T \frac{D \tilde{L} \eta_k^2 \tilde{L}_k}{T^3} + \frac{D}{2} \|\mathbf{s}_T\|_1. \end{aligned}$$

**Proof of Theorem 4** Parts of this proof which differ from the proof of Theorem 3 are bolded. Noting that  $\mathbf{p}_k = -L(\mathbf{y}_{k+1} - \mathbf{x}_k)$  is the gradient map-

ping of  $F$  on  $\mathcal{C}$ , it follows that

$$\begin{aligned} & \sum_{k=1}^T \eta_k (F(\mathbf{y}_{k+1}) - F(\mathbf{u})) \\ & = \sum_{k=1}^T \eta_k (F(\mathbf{prox}(\mathbf{x}_k)) - F(\mathbf{u})) \\ & \leq \sum_{k=1}^T \eta_k \langle \mathbf{p}_k, \mathbf{x}_k - \mathbf{u} \rangle - \frac{\eta_k}{2L} \|\mathbf{p}_k\|_2^2 \\ & = \sum_{k=1}^T \eta_k \langle \mathbf{p}_k, (\mathbf{z}_k - \mathbf{u}) \rangle + \sum_{k=1}^T \eta_k \langle \mathbf{p}_k, \mathbf{x}_k - \mathbf{z}_k \rangle \\ & \quad - \frac{\eta_k}{2L} \|\mathbf{p}_k\|_2^2 \\ & \leq \sum_{k=1}^T \frac{\eta_k^2}{2} \|\mathbf{p}_k\|_{S_k}^2 + \frac{D}{2} \|\mathbf{s}_T\|_1 + \sum_{k=1}^T \eta_k \langle \mathbf{p}_k, \mathbf{x}_k - \mathbf{z}_k \rangle \\ & \quad - \frac{\eta_k}{2L} \|\mathbf{p}_k\|_2^2 \\ & = \sum_{k=1}^T \frac{\eta_k (\eta_k \tilde{L}_k - 1)}{2L} \|\mathbf{p}_k\|_2^2 + \frac{D}{2} \|\mathbf{s}_T\|_1 \\ & \quad + \sum_{k=1}^T \eta_k \langle \mathbf{p}_k, \mathbf{x}_k - \mathbf{z}_k \rangle \\ & \leq \sum_{k=1}^T \frac{\eta_k (\eta_k \tilde{L}_k - 1)}{2L} \|\mathbf{p}_k\|_2^2 + \frac{D}{2} \|\mathbf{s}_T\|_1 \\ & \quad + \sum_{k=1}^T \left( \eta_k (\eta_k \tilde{L}_k - 1) \langle \mathbf{p}_k, \mathbf{y}_k - \mathbf{x}_k \rangle + \frac{DL \eta_k^2 \tilde{L}_k}{T^3} \right) \\ & \leq \sum_{k=1}^T \frac{DL \eta_k^2 \tilde{L}_k}{T^3} + \frac{D}{2} \|\mathbf{s}_T\|_1 \\ & \quad + \sum_{k=1}^T \eta_k (\eta_k \tilde{L}_k - 1) (F(\mathbf{y}_k) - F(\mathbf{y}_{k+1})). \end{aligned}$$

Where the first inequality follows from Lemma 1, the second inequality follows from Lemma 4, the last equality follows from Steps 9 and 11 of Alg 4, Steps 8 and 9 of Alg 5, and the second last inequality follows from Corollary 2, and the last equality follows from Lemma 1.

Now we have

$$\begin{aligned}
& \sum_{k=1}^T \eta_k (F(\mathbf{y}_{k+1}) - F(\mathbf{u})) \\
& \quad - \eta_k (\eta_k \tilde{L}_k - 1) (F(\mathbf{y}_k) - F(\mathbf{y}_{k+1})) \\
& = \sum_{k=1}^T \eta_k F(\mathbf{y}_{k+1}) - \eta_k F(\mathbf{u}) - \eta_k (\eta_k \tilde{L}_k - 1) F(\mathbf{y}_k) \\
& \quad + \eta_k (\eta_k \tilde{L}_k - 1) F(\mathbf{y}_{k+1}) \\
& = \sum_{k=1}^T \eta_k^2 L_k F(\mathbf{y}_{k+1}) - \eta_k F(\mathbf{u}) - \eta_k (\eta_k \tilde{L}_k - 1) F(\mathbf{y}_k) \\
& = \eta_T^2 \tilde{L}_T F(\mathbf{y}_{T+1}) \\
& \quad + \sum_{k=1}^T \eta_{k-1}^2 \tilde{L}_{k-1} F(\mathbf{y}_k) - \eta_k F(\mathbf{u}) \\
& \quad - \eta_k (\eta_k \tilde{L}_k - 1) F(\mathbf{y}_k) \\
& = \eta_T^2 \tilde{L}_T F(\mathbf{y}_{T+1}) \\
& \quad + \sum_{k=1}^T \left( \eta_{k-1}^2 \tilde{L}_{k-1} - \eta_k^2 \tilde{L}_k + \eta_k \right) F(\mathbf{y}_k) - \eta_k F(\mathbf{u}),
\end{aligned}$$

and the result follows.  $\blacksquare$

We now set out to put the final piece of the proof in place: choosing the stepsize  $\eta_k$  for the mirror descent step.

#### Lemma 6

For the choice of  $\eta_k$  in Algorithm 1 and  $k \geq 1$ , we have

- (i)  $\eta_k^2 L_k = \sum_{i=1}^k \eta_i$ ,
- (ii)  $\eta_{k-1}^2 L_{k-1} - \eta_k^2 L_k + \eta_k = 0$ , and
- (iii)  $\eta_k L_k \geq 1$ .

**Proof** We prove (i) by induction. For  $k = 1$ , is easy to verify that  $\eta_1 = 1/L_1$ , and so  $\eta_1^2 L_1 = \eta_1$  and the base case follows trivially. Now suppose  $\eta_{k-1}^2 L_{k-1} = \sum_{i=1}^{k-1} \eta_i$ . Re-arranging (i) for  $k$  gives

$$0 = \eta_k^2 L_k - \eta_k - \sum_{i=1}^{k-1} \eta_i = \eta_k^2 L_k - \eta_k - \eta_{k-1}^2 L_{k-1}.$$

Now, it is easy to verify that the choice of  $\eta_k$  in Algorithm 1 is a solution of the above quadratic equation. The rest of the items follow immediately from part (i).  $\blacksquare$

Once again, the FLARE analog of Lemma 6 is

#### Lemma 7

For the choice of  $\eta_k$  in Algorithm 3 and  $k \geq 1$ , we have

- (i)  $\eta_k^2 \tilde{L}_k = \sum_{i=1}^k \eta_i$ ,
- (ii)  $\eta_{k-1}^2 \tilde{L}_{k-1} - \eta_k^2 \tilde{L}_k + \eta_k = 0$ , and
- (iii)  $\eta_k \tilde{L}_k \geq 1$ .

**Proof of Lemma 7** Completely identical to proof of Lemma 6.

#### Corollary 3

Let  $D := \sup_{\mathbf{x}, \mathbf{y} \in \mathcal{C}} \|\mathbf{x} - \mathbf{y}\|_\infty^2$ . For any  $\mathbf{u} \in \mathcal{C}$ , after  $T$  iterations of Algorithm 1, we get

$$F(\mathbf{y}_{T+1}) - F(\mathbf{u}) \leq \frac{LD}{T^2} + \frac{D \|\mathbf{s}_T\|_1}{2 \sum_{k=1}^T \eta_k}.$$

**Proof of corollary 3** The result follows from Theorem 3 and Lemma 6 as well as noting that  $\eta_k^2 L_k = \sum_{i=1}^k \eta_i \leq \sum_{i=1}^T \eta_i = \eta_T^2 L_T$ .  $\blacksquare$

The FLARE analog:

#### Corollary 4

Let  $D := \sup_{\mathbf{x}, \mathbf{y} \in \mathcal{C}} \|\mathbf{x} - \mathbf{y}\|_\infty^2$ . For any  $\mathbf{u} \in \mathcal{C}$ , after  $T$  iterations of Algorithm 3, we get

$$F(\mathbf{y}_{T+1}) - F(\mathbf{u}) \leq \frac{LD}{T^2} + \frac{D \|\mathbf{s}_T\|_1}{2 \sum_{k=1}^T \eta_k}.$$

**Proof of corollary 4** The result follows from Theorem 4 and Lemma 7 as well as noting that  $\eta_k^2 L_k = \sum_{i=1}^k \eta_i \leq \sum_{i=1}^T \eta_i = \eta_T^2 \tilde{L}_T$ .  $\blacksquare$

Finally, it only remains to lower bound  $\sum_{k=1}^T \eta_k$ , which is done in the following Lemma.

#### Lemma 8

For the choice of  $\eta_k$  in Algorithm 1, we have

$$\sum_{k=1}^T \eta_k \geq \frac{T^3}{1000 \sum_{k=1}^T L_k}$$

**Proof of Lemma 8** We prove by induction on  $T$ . For  $T = 1$ , we have  $\eta_1 = 1/L_1$ , and the base case holds trivially. Suppose the desired relation holds for  $T - 1$ . We have

$$\begin{aligned} \sum_{k=1}^T \eta_k &= \sum_{k=1}^{T-1} \eta_k + \eta_T \\ &\geq \frac{(T-1)^3}{1000 \sum_{k=1}^{T-1} L_k} + \frac{1}{2L_T} \\ &\quad + \sqrt{\frac{1}{4L_T^2} + \frac{(T-1)^3}{1000L_T \sum_{k=1}^{T-1} L_k}} \\ &\geq \frac{(T-1)^3}{1000 \sum_{k=1}^{T-1} L_k} + \sqrt{\frac{(T-1)^3}{1000L_T \sum_{k=1}^{T-1} L_k}} \\ &\geq \frac{(T-1)^3}{1000 \sum_{k=1}^{T-1} L_k} + \sqrt{\frac{T^3}{8000L_T \sum_{k=1}^{T-1} L_k}}. \end{aligned}$$

Where the first inequality is by the induction hypothesis on  $\eta_k$ . Now if

$$\frac{(T-1)^3}{1000 \sum_{k=1}^{T-1} L_k} \geq \frac{T^3}{1000 \sum_{k=1}^T L_k},$$

then we are done. Otherwise denoting  $\alpha := \sum_{k=1}^T L_k$ , we must have that

$$\begin{aligned} L_T &\leq \frac{\alpha T^3 - \alpha(T-1)^3}{T^3} \\ &= \frac{\alpha T^3 - \alpha(T^3 - 3T^2 + 3T - 1)}{T^3} \\ &= \frac{\alpha(3T^2 - 3T + 1)}{T^3} \\ &\leq \frac{4 \sum_{k=1}^T L_k}{T}. \end{aligned}$$

Hence, we get

$$\begin{aligned} \sum_{k=1}^T \eta_k &\geq \frac{(T-1)^3}{1000 \sum_{k=1}^{T-1} L_k} + \sqrt{\frac{T^4}{32000L_T \left(\sum_{k=1}^T L_k\right)^2}} \\ &\geq \frac{(T-1)^3}{1000 \sum_{k=1}^T L_k} + \frac{4T^2}{1000 \sum_{k=1}^T L_k} \\ &\geq \frac{T^3}{1000 \sum_{k=1}^T L_k}. \end{aligned}$$

■

**Remark:** We note here that we made little effort to minimize constants, and that we used rather sloppy bounds such as  $T - 1 \geq T/2$ . As a result, the constant appearing above is very conservative and a mere by product of our proof technique.

### Lemma 9

For the choice of  $\eta_k$  in Algorithm 3, we have

$$\sum_{k=1}^T \eta_k \geq \frac{T^3}{\lambda \cdot 1000 \sum_{k=1}^T L_k}$$

**Proof of Lemma 9** Once again, exactly identical to the proof of Lemma 8, we have

$$\sum_{k=1}^T \eta_k \geq \frac{T^3}{1000 \sum_{k=1}^T \tilde{L}_k}$$

Finally, using the guarantee that  $\tilde{L}_k \leq \lambda L_k$  from Step 11 of Algorithm 4 and Step 9 from Algorithm 5, we get the conclusion.

The proof of FLAG's main result, Theorem 1, follows rather immediately.

**Proof of Theorem 1** The result follows immediately from Lemma 8 and Corollary 3 and noting that  $\sum_{k=1}^T L_k = L \sum_{k=1}^T \mathbf{g}_k^T S_k^{-1} \mathbf{g}_k \leq 2Lq_T$  by Lemma 5 and  $\|\mathbf{s}_T\|_1 = q_T$  by Step 6 of Algorithm 1 and definition of  $q_T$  in Lemma 5. This gives

$$F(\mathbf{y}_{T+1}) - F(\mathbf{u}) \leq \frac{LD}{T^2} + \frac{q_T^2}{T} \frac{1000LD}{T^2} \leq \frac{q_T^2}{T} \frac{1001LD}{T^2}.$$

Now from Lemma 5, we see that  $\beta := q_T^2/T \in [1, d]$ . Finally, the run-time per iteration follows from having to do  $\log_2(1/\epsilon)$  calls to bisection, each taking  $\mathcal{O}(\mathcal{T}_{\text{prox}})$  time. ■

The proof of FLARE's main result, Theorem 2, is obtained similarly to that of Theorem 1.

**Proof of Theorem 2** The result follows immediately from Lemma 9 and Corollary 4 and noting that  $\sum_{k=1}^T L_k = L \sum_{k=1}^T \mathbf{g}_k^T S_k^{-1} \mathbf{g}_k \leq 2Lq_T$  by Lemma 5 and  $\|\mathbf{s}_T\|_1 = q_T$  by Step 6 of Algorithm 4 and Step 5 of Algorithm 5 and definition of  $q_T$  in Lemma 5. This gives

$$\begin{aligned} F(\mathbf{y}_{T+1}) - F(\mathbf{u}) &\leq \frac{LD}{T^2} + \frac{q_T^2}{T} \frac{1000\lambda LD}{T^2} \\ &\leq \frac{q_T^2}{T} \frac{1001\lambda LD}{T^2}. \end{aligned}$$

Now from Lemma 5, we see that  $\beta := q_T^2/T \in [1, d]$ . Finally, we try to guess a suitable  $\tilde{L}_k$  for  $\log(d/\epsilon)$  times, and resort to BinarySearch after. If we resort



to algorithm 5 (essentially BinarySearch), we make  $\log(1/\epsilon)$  calls to bisection, so overall the number of inner iterations per outer iteration is same as Algorithm 1. Each inner iteration takes  $\mathcal{O}(\mathcal{T}_{\text{prox}})$  time in the worst case (if we have to resort to algorithm 5 each time). ■
